# Supplementary material for: Sex differences in investigations and outcomes among patients with type 2 myocardial infarction
Source: PubMed Central journal article supplement — Heart. 2021 Apr 20;107(18):1480–6. doi: 10.1136/heartjnl-2021-319118 (PMC8408584; doi:10.1136/heartjnl-2021-319118), 2021-04-20
Supplement: heartjnl-2021-319118supp001.pdf [file heartjnl-2021-319118supp001.pdf]

## SUPPLEMENTAL MATERIAL

**Sex differences in investigations and outcomes among patients with type 2 myocardial infarction**

Dorien M Kimenai<sup>1</sup>, Bertil Lindahl<sup>2,3</sup>, Andrew R Chapman<sup>4</sup>, Tomasz Baron<sup>2</sup>, Anton Gard<sup>2</sup>, Ryan Wereski<sup>4</sup>, Steven JR Meex<sup>5,6</sup>, Tomas Jernberg<sup>7</sup>, Nicholas L Mills<sup>1,4</sup>, Kai M Eggers<sup>2</sup>

**Running title:** Kimenai et al.; Men and women with type 2 MI

<sup>1</sup> Usher Institute, University of Edinburgh, Edinburgh, United Kingdom;

<sup>2</sup> Department of Medical Sciences, Cardiology, Uppsala University, Uppsala, Sweden;

<sup>3</sup> Uppsala Clinical Research Center, Uppsala University, Uppsala, Sweden;

<sup>4</sup> BHF Centre for Cardiovascular Science, University of Edinburgh, Edinburgh, United Kingdom;

<sup>5</sup> Central Diagnostic Laboratory, Maastricht University Medical Center, Maastricht, the Netherlands;

<sup>6</sup> CARIM School for Cardiovascular Diseases, Maastricht University, Maastricht, the Netherlands;

<sup>7</sup> Department of Clinical Sciences, Danderyd University Hospital, Karolinska Institute, Stockholm, Sweden

**Supplemental Table 1. Number (%) of missing values of clinical characteristics**

| <b>Variable</b>                | <b>Overall<br/>(n = 63,749)</b> | <b>Women<br/>(n = 23,120)</b> | <b>Men<br/>(n = 40,629 )</b> | <b>Type 1 MI<br/>(n = 57,264)</b> | <b>Type 2 MI<br/>(n = 6485)</b> |
|--------------------------------|---------------------------------|-------------------------------|------------------------------|-----------------------------------|---------------------------------|
| <b>Demographics</b>            |                                 |                               |                              |                                   |                                 |
| Age                            | 0 (0.0%)                        | 0 (0.0%)                      | 0 (0.0%)                     | 0 (0.0%)                          | 0 (0.0%)                        |
| Body mass index                | 3813 (6.0%)                     | 1748 (7.6%)                   | 2065 (5.1%)                  | 3128 (5.4%)                       | 685 (10.6%)                     |
| <b>Risk factors</b>            |                                 |                               |                              |                                   |                                 |
| Current smoking                | 4451 (7.0%)                     | 2048 (8.9%)                   | 2403 (5.9%)                  | 3567 (6.2%)                       | 884 (13.6%)                     |
| Hypertension                   | 356 (0.6%)                      | 111 (0.5%)                    | 245 (0.6%)                   | 310 (0.5%)                        | 46 (0.7%)                       |
| Diabetes                       | 99 (0.2%)                       | 39 (0.2%)                     | 60 (0.1%)                    | 92 (0.2%)                         | 7 (0.1%)                        |
| Hyperlipidemia                 | 264 (0.4%)                      | 93 (0.4%)                     | 171 (0.4%)                   | 236 (0.4%)                        | 28 (0.4%)                       |
| eGFR                           | 1855 (2.9%)                     | 733 (3.2%)                    | 1122 (2.8%)                  | 1525 (2.7%)                       | 330 (5.1%)                      |
| <b>Medical history</b>         |                                 |                               |                              |                                   |                                 |
| Previous myocardial infarction | 342 (0.5%)                      | 118 (0.5%)                    | 224 (0.6%)                   | 293 (0.5%)                        | 49 (0.8%)                       |
| Previous CABG                  | 170 (0.3%)                      | 71 (0.3%)                     | 99 (0.2%)                    | 152 (0.3%)                        | 18 (0.3%)                       |
| Previous PCI                   | 537 (0.8%)                      | 205 (0.9%)                    | 332 (0.8%)                   | 460 (0.8%)                        | 77 (1.2%)                       |
| Heart failure                  | 2087 (3.3%)                     | 793 (3.4%)                    | 1294 (3.2%)                  | 1861 (3.2%)                       | 226 (3.5%)                      |
| Previous stroke                | 206 (0.3%)                      | 85 (0.4%)                     | 121 (0.3%)                   | 177 (0.3%)                        | 29 (0.4%)                       |

|                                                 |               |              |              |               |              |
|-------------------------------------------------|---------------|--------------|--------------|---------------|--------------|
| COPD                                            | 0 (0.0%)      | 0 (0.0%)     | 0 (0.0%)     | 0 (0.0%)      | 0 (0.0%)     |
| Dementia                                        | 0 (0.0%)      | 0 (0.0%)     | 0 (0.0%)     | 0 (0.0%)      | 0 (0.0%)     |
| Previous or present cancer                      | 0 (0.0%)      | 0 (0.0%)     | 0 (0.0%)     | 0 (0.0%)      | 0 (0.0%)     |
| <b>ECG findings</b>                             |               |              |              |               |              |
| Heart Rhythm                                    | 433 (0.7%)    | 136 (0.6%)   | 297 (0.7%)   | 380 (0.7%)    | 53 (0.8%)    |
| Ischemic findings                               | 807 (1.3%)    | 300 (1.3%)   | 507 (1.2%)   | 663 (1.2%)    | 144 (2.2%)   |
| <b>In-hospital examination and intervention</b> |               |              |              |               |              |
| Echocardiography                                | 58 (0.1%)     | 22 (0.1%)    | 36 (0.1%)    | 52 (0.1%)     | 6 (0.1%)     |
| Coronary angiography                            | 0 (0.0%)      | 0 (0.0%)     | 0 (0.0%)     | 0 (0.0%)      | 0 (0.0%)     |
| PCI                                             | 0 (0.0%)      | 0 (0.0%)     | 0 (0.0%)     | 0 (0.0%)      | 0 (0.0%)     |
| CABG                                            | 311 (0.5%)    | 121 (0.5%)   | 190 (0.5%)   | 257 (0.4%)    | 54 (0.8%)    |
| <b>Angiographic findings*</b>                   | 17930 (28.2%) | 8323 (36.0%) | 9607 (23.6%) | 13741 (24.0%) | 4189 (64.6%) |
| <b>Left ventricular ejection fraction*</b>      | 15114 (23.8%) | 6311 (27.3%) | 8803 (21.7%) | 12807 (22.4%) | 2307 (35.6%) |
| <b>Medication at discharge</b>                  |               |              |              |               |              |
| Aspirin                                         | 917 (1.4%)    | 374 (1.6%)   | 543 (1.3%)   | 789 (1.4%)    | 128 (2.0%)   |
| P2Y12 inhibitors                                | 914 (1.4%)    | 372 (1.6%)   | 542 (1.3%)   | 787 (1.4%)    | 127 (2.0%)   |
| Anticoagulants                                  | 926 (1.5%)    | 373 (1.6%)   | 553 (1.4%)   | 798 (1.4%)    | 128 (2.0%)   |
| B-blockers                                      | 916 (1.4%)    | 372 (1.6%)   | 544 (1.3%)   | 789 (1.4%)    | 127 (2.0%)   |

|                                   |            |            |            |            |            |
|-----------------------------------|------------|------------|------------|------------|------------|
| ACEI                              | 933 (1.5%) | 372 (1.6%) | 561 (1.4%) | 804 (1.4%) | 129 (2.0%) |
| ARB                               | 919 (1.4%) | 373 (1.6%) | 546 (1.3%) | 793 (1.4%) | 126 (1.9%) |
| Statins                           | 915 (1.4%) | 371 (1.6%) | 544 (1.3%) | 788 (1.4%) | 127 (2.0%) |
| <b>Cardiac troponin T</b>         | 0 (0.0%)   | 0 (0.0%)   | 0 (0.0%)   | 0 (0.0%)   | 0 (0.0%)   |
| Duration of hospital stays (days) | 15 (0.0%)  | 1 (0.0%)   | 14 (0.0%)  | 14 (0.0%)  | 1(0.0%)    |

\*Number (%) of which no coronary angiogram or echocardiogram is performed.

**Supplemental Table 2. Associations of clinical characteristics with major cardiovascular adverse events in type 2 myocardial infarction, stratified by sex**

|                          | Total             | Men              | Women            |                                          |
|--------------------------|-------------------|------------------|------------------|------------------------------------------|
| Clinical characteristics | HR (95% CI)       | HR (95% CI)      | HR (95% CI)      | <i>P</i> <sub>interaction</sub> with sex |
| Sex (men, ref category)  | 0.94 (0.86-1.02)  | -                | -                | -                                        |
| Age (per 10 years)       | 1.57 (1.49-1.65)* | 1.57 (1.46-1.68) | 1.58 (1.47-1.70) | 0.829                                    |
| Current smoking          | 1.24 (1.09-1.41)* | 1.17 (0.98-1.40) | 1.32 (1.10-1.60) | 0.302                                    |
| Hypertension             | 0.95 (0.87-1.04)  | 0.94 (0.83-1.07) | 0.95 (0.83-1.09) | 0.833                                    |
| Diabetes                 | 1.34 (1.21-1.48)* | 1.35 (1.18-1.55) | 1.40 (1.21-1.62) | 0.246                                    |
| Hyperlipidemia           | 0.97 (0.88-1.07)  | 0.93 (0.81-1.06) | 1.04 (0.91-1.20) | 0.008 <sup>†</sup>                       |
| Coronary artery disease  | 1.22 (1.10-1.35)* | 1.04 (0.91-1.20) | 1.43 (1.24-1.65) | <0.001 <sup>†</sup>                      |
| Congestive heart failure | 1.57 (1.40-1.76)* | 1.67 (1.44-1.95) | 1.50 (1.26-1.78) | 0.553                                    |
| Ischemic stroke          | 1.37 (1.22-1.54)* | 1.29 (1.10-1.51) | 1.45 (1.22-1.73) | 0.178                                    |
| ST-segment depression    | 1.34 (1.20-1.51)* | 1.28 (1.09-1.51) | 1.37 (1.16-1.61) | 0.353                                    |
| Ln eGFR                  | 0.66 (0.60-0.72)* | 0.67 (0.60-0.75) | 0.66 (0.58-0.76) | 0.609                                    |
| COPD                     | 1.52 (1.36-1.69)* | 1.46 (1.25-1.70) | 1.58 (1.35-1.85) | 0.460                                    |
| Dementia                 | 1.23 (0.80-1.87)  | 1.14 (0.61-2.13) | 1.24 (0.69-2.20) | 0.974                                    |
| Previous cancer          | 1.28 (1.09-1.49)* | 1.27 (1.05-1.54) | 1.31 (1.00-1.71) | 0.729                                    |
| Ln hs-cTnT               | 1.13 (1.09-1.17)* | 1.12 (1.06-1.17) | 1.16 (1.10-1.22) | 0.311                                    |

*Analyses are adjusted for all assessed variables including hospital and admission year.  $P_{interaction}$  refers to the interaction of sex with the multivariable-adjusted association of each respective covariate with clinical outcome. \* $P < 0.05$ . † $P < 0.1$ .*

**Supplemental Table 3. Risk of all-cause death and major adverse events for patients with type 2 myocardial infarction compared to type 1 myocardial infarction stratified by sex (STEMI patients included)**

|                                                | Total            |         | Men              |         | Women            |         |
|------------------------------------------------|------------------|---------|------------------|---------|------------------|---------|
|                                                | HR (95% CI)      | P-value | HR (95% CI)      | P-value | HR (95% CI)      | P-value |
| <b>All-cause death*</b>                        |                  |         |                  |         |                  |         |
| <b>(Type 1 MI ref category)</b>                |                  |         |                  |         |                  |         |
| Model 1 (crude)                                | 2.42 (2.31-2.54) | <0.001  | 3.32 (3.11-3.55) | <0.001  | 1.80 (1.68-1.94) | <0.001  |
| Model 2 (model 1 + adjusted for comorbidities) | 1.40 (1.33-1.47) | <0.001  | 1.49 (1.39-1.59) | <0.001  | 1.30 (1.21-1.40) | <0.001  |
| <b>MACE<sup>†</sup></b>                        |                  |         |                  |         |                  |         |
| <b>(Type 1 MI ref category)</b>                |                  |         |                  |         |                  |         |
| Model 1 (crude)                                | 2.07 (1.98-2.17) | <0.001  | 2.65 (2.49-2.82) | <0.001  | 1.65 (1.54-1.76) | <0.001  |
| Model 2 (model 1 + adjusted for comorbidities) | 1.28 (1.22-1.34) | <0.001  | 1.32 (1.24-1.41) | <0.001  | 1.22 (1.14-1.31) | <0.001  |

\*Total, n=73,100 (STEMI, n=25,430, NSTEMI, n=47,760); women, n=24,213 (STEMI, n=7,549, NSTEMI, n=16,664); men, n=48,887 (STEMI, n=17,791, NSTEMI, n=31,096).  $P_{interaction} MI\ status * sex = 0.005$  †Total, n= 70,118 (STEMI, n=24,255, NSTEMI, n=45,863); women, n=23,282 (STEMI, n=7,244, NSTEMI, n=16,038); men, n=46,836 (STEMI, n=17,011, NSTEMI, n=29,825).  $P_{interaction} MI\ status * sex = 0.124$ . Model 1: MI type, sex, hospital site, year; model 2: model 1 + age, current smoking, hypertension, diabetes, hyperlipidemia, previous myocardial infarction, congestive heart failure, previous stroke, ST-segment depression, estimated glomerular filtration rate, COPD, dementia, previous or present cancer. In sex-stratified analysis, sex is not included in the models.

**Supplemental Table 4. Risk of all-cause death and major adverse cardiovascular events for men and women with type 2 myocardial infarction (STEMI patients included)**

|                                                                       | HR (95% CI)      | P-value |
|-----------------------------------------------------------------------|------------------|---------|
| <b>All-cause death* (men, reference category)</b>                     |                  |         |
| Model 1 (crude)                                                       | 0.83 (0.76-0.91) | <0.001  |
| Model 2 (model 1 + adjusted for comorbidities)                        | 0.83 (0.75-0.91) | <0.001  |
| <b>Major adverse cardiovascular events† (men, reference category)</b> |                  |         |
| Model 1 (crude)                                                       | 0.88 (0.81-0.96) | 0.003   |
| Model 2 (model 1 + adjusted for comorbidities)                        | 0.92 (0.84-1.01) | 0.067   |

\*Type 2 MI patients, n=4,390 (STEMI, n=271, NSTEMI, n=4,119). †Type 2 MI patients, n=4,242 (STEMI, n=263, NSTEMI, n=3,979). Model 1: sex, hospital site, year; model 2: model 1 + age, current smoking, hypertension, diabetes, hyperlipidemia, coronary artery disease, congestive heart failure, previous stroke, ST-segment depression, estimated glomerular filtration rate, COPD, dementia, previous or present cancer.



**Supplemental Table 5. Risk of all-cause death and major adverse events for patients with type 2 myocardial infarction compared to type 1 myocardial infarction stratified by sex (adjusted for coronary status)**

|                                                         | Total            |         | Men              |         | Women            |         |
|---------------------------------------------------------|------------------|---------|------------------|---------|------------------|---------|
|                                                         | HR (95% CI)      | P-value | HR (95% CI)      | P-value | HR (95% CI)      | P-value |
| <b>All-cause death*</b>                                 |                  |         |                  |         |                  |         |
| <b>(Type 1 MI, ref category)</b>                        |                  |         |                  |         |                  |         |
| Model 1 (adjusted for coronary status)                  | 1.59 (1.43-1.77) | <0.001  | 2.13 (1.85-2.45) | <0.001  | 1.15 (0.97-1.36) | 0.111   |
| Model 2 (model 1 + adjusted for comorbidities)          | 1.29 (1.15-1.45) | <0.001  | 1.31 (1.13-1.52) | <0.001  | 1.28 (1.07-1.53) | 0.007   |
| Model 3 (model 2 + adjusted for hs-cTnT concentrations) | 1.29 (1.15-1.44) | <0.001  | 1.31 (1.14-1.52) | <0.001  | 1.26 (1.06-1.51) | 0.011   |
| <b>MACE†</b>                                            |                  |         |                  |         |                  |         |
| <b>(Type 1 MI, ref category)</b>                        |                  |         |                  |         |                  |         |
| Model 1 (adjusted for coronary status)                  | 1.43 (1.31-1.57) | <0.001  | 1.76 (1.56-1.98) | <0.001  | 1.15 (1.01-1.32) | 0.040   |
| Model 2 (model 1 + adjusted for comorbidities)          | 1.15 (1.05-1.27) | 0.003   | 1.09 (0.96-1.23) | 0.192   | 1.26 (1.10-1.46) | 0.001   |
| Model 3 (model 2 + adjusted for hs-cTnT concentrations) | 1.15 (1.05-1.26) | 0.004   | 1.09 (0.96-1.23) | 0.187   | 1.25 (1.08-1.44) | 0.002   |

\*Total, n=32,743; women, n=11,874; men, n=25,369.  $P_{interaction} MI\ status*sex = 0.312$ . †Total, n=35,649; women, n=11,368; men, n=24,281.  $P_{interaction} MI\ status*sex = 0.497$ .

Model 1: MI type, sex, hospital site, year, coronary status; model 2: model 1 + age, current smoking, hypertension, diabetes, hyperlipidemia, coronary artery disease, congestive heart failure, previous stroke, ST-segment depression, estimated glomerular filtration rate, COPD, dementia, previous or present cancer, coronary artery status; model 3: model 2 + hs-cTnT. In sex-stratified analysis, sex is not included in the models.

**Supplemental Table 6. Risk of all-cause death and major adverse cardiovascular events for men and women with type 2 myocardial infarction (adjusted for coronary status)**

|                                                                       | HR (95% CI)      | P-value |
|-----------------------------------------------------------------------|------------------|---------|
| <b>All-cause death* (men, reference category)</b>                     |                  |         |
| Model 1 (adjusted for coronary status)                                | 0.65 (0.53-0.80) | <0.001  |
| Model 2 (model 1 + adjusted for comorbidities)                        | 0.80 (0.63-1.01) | 0.059   |
| Model 3 (model 2 + adjusted for hs-cTnT concentrations)               | 0.80 (0.63-1.01) | 0.060   |
| <b>Major adverse cardiovascular events† (men, reference category)</b> |                  |         |
| Model 1 (adjusted for coronary status)                                | 0.77 (0.65-0.92) | 0.004   |
| Model 2 (model 1 + adjusted for comorbidities)                        | 1.03 (0.85-1.26) | 0.740   |
| Model 3 (model 2 + adjusted for hs-cTnT concentrations)               | 1.03 (0.85-1.26) | 0.739   |

\* type 2 MI, NSTEMI patients, n=1,761. † type 2 MI, NSTEMI patients, n=1,673. Model 1: sex, hospital site, year, coronary status; model 2: model 1 + age, current smoking, hypertension, diabetes, hyperlipidemia, coronary artery disease, congestive heart failure, previous stroke, ST-segment depression, estimated glomerular filtration rate, COPD, dementia, previous or present cancer, coronary artery status; model 3: model 2 + hs-cTnT. Coronary status is based on coronary angiography findings.

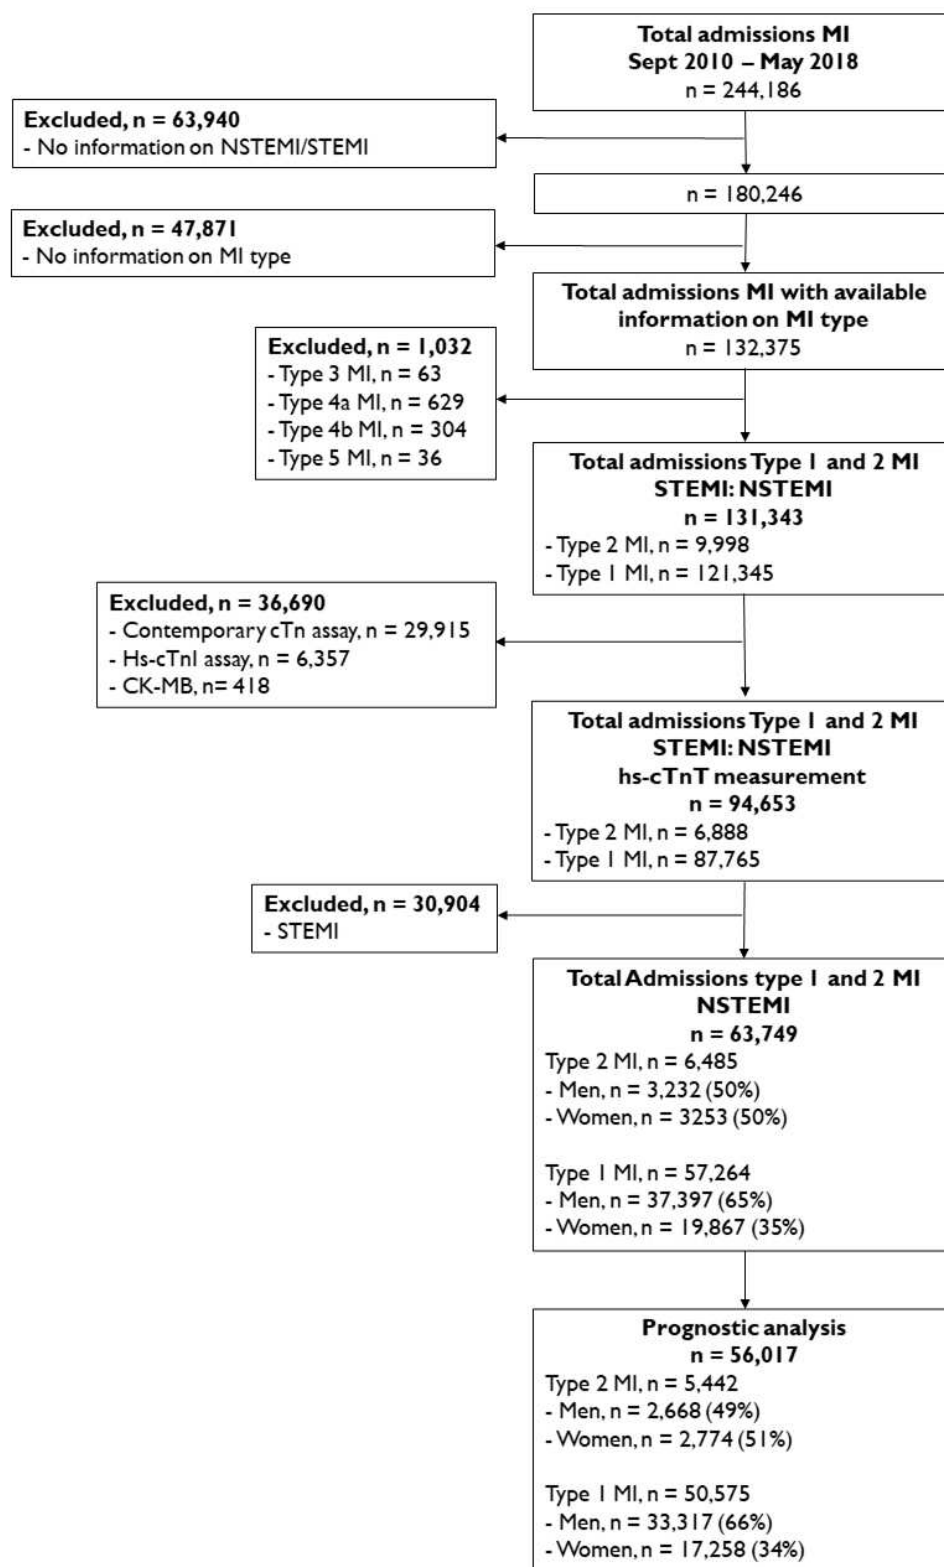

Supplemental Figure 1. Study flow diagram.
